# Supplementary material for: Effect of EVAR on International Ruptured AAA Mortality—Sex and Geographic Disparities
Source: MDPI journal article supplement (doi:10.3390/jcm13092464), 2024-04-23
Supplement: s1 [file s1]

## Supplement

### S1. Data sources

Ruptured AAA deaths: Secondary sources such as the Global Health Data Exchange <https://ghdx.healthdata.org/series/global-burden-disease-gbd> do not distinguish mortality due to intact vis-à-vis ruptured aneurysms. Accordingly, age-adjusted mortality due to ruptured AAAs by sex (female/male) was calculated from secondary data on deaths and population.

All states except Finland and Taiwan: World Health Organization, [www.who.int/healthinfo/statistics/mortality\\_rawdata/en/](http://www.who.int/healthinfo/statistics/mortality_rawdata/en/). To conform with the procedural data, the data on mortality for Great Britain were limited to England and Wales. Finland: Official Statistics of Finland (OSF): Causes of death, [http://www.stat.fi/til/ksyyt/index\\_en.html](http://www.stat.fi/til/ksyyt/index_en.html). Taiwan: Health Promotion Administration and Statistics Office, Ministry of Health and Welfare.

Population: All states except Taiwan: World Development Indicators, <https://data.worldbank.org/>. Taiwan: Department of Household Registration Affairs, Ministry of the Interior [https://www.moi.gov.tw/files/site\\_stuff/321/2/year/year.html](https://www.moi.gov.tw/files/site_stuff/321/2/year/year.html).

Table S1. Ruptured AAA repair: Open and endovascular

| State           | Source                                             | Reference                                                                                                                                                                                                                                                                                                                                                                    |
|-----------------|----------------------------------------------------|------------------------------------------------------------------------------------------------------------------------------------------------------------------------------------------------------------------------------------------------------------------------------------------------------------------------------------------------------------------------------|
| Australia / AUS | Australian Institute of Health and Welfare         | Open repair: Procedures data cubes <a href="https://www.aihw.gov.au/reports/hospitals/procedures-data-cubes/contents/data-cubes">https://www.aihw.gov.au/reports/hospitals/procedures-data-cubes/contents/data-cubes</a><br>Endovascular repair: requisitioned from Performance Indicators and Quality Unit Health Systems Group, Australian Institute of Health and Welfare |
| Austria / AUT   | Statistik Austria                                  | Requisitioned from Bundesanstalt Statistik Österreich<br>Direktion Bevölkerung<br>Demographie und Gesundheit                                                                                                                                                                                                                                                                 |
| Denmark / DNK   | Danish Vascular Registry (Landsregisteret Karbase) | Danish Clinical Quality Program – National Clinical Registries;<br><a href="http://www.rkkp.dk/in-english/">www.rkkp.dk/in-english/</a>                                                                                                                                                                                                                                      |

|                                         |                                                                          |                                                                                                                                                                                                                                                                                                                                                                                                                                                                                 |
|-----------------------------------------|--------------------------------------------------------------------------|---------------------------------------------------------------------------------------------------------------------------------------------------------------------------------------------------------------------------------------------------------------------------------------------------------------------------------------------------------------------------------------------------------------------------------------------------------------------------------|
| Finland / FIN                           | Care Register for Health Care, National Institute for Health and Welfare | Laine, Matti T., Sani J. Laukontaus, Reijo Sund, Pekka S. Aho, Ilkka Kantonen, Anders Aläck, and Maarit Venermo, "A population-based study of abdominal aortic aneurysm treatment in Finland 2000 to 2014", Circulation Vol. 136, No. 18 (2017): 1726-1734.                                                                                                                                                                                                                     |
| Germany / DEU                           | Federal Statistical Office (Statistisches Bundesamt)                     | Olga von Beckerath, Sebastian Schrader, Marcus Katoh, Bernd Luther, Frans Santosa, and Knut Kröger, "Mortality in endovascular and open abdominal aneurysm repair-trends in Germany", Vasa, Vol. 47 No. 1 (2018), 43-48, ESM1.<br>Matthias Trenner, Michael Salvermoser, Albert Busch, Volker Schmid, Hans-Henning Eckstein, Andreas Kühnl, "Mindestmengeneffekte bei der Therapie des abdominalen Aortenaneurysmas", Deutsches Ärzteblatt, Vol. 117, No. 48, 27 November 2020. |
| Great Britain (England and Wales) / GBR | National Health Service                                                  | Hospital Admitted Patient Care Activity: English NHS hospitals<br><a href="https://digital.nhs.uk/data-and-information/publications/statistical/hospital-admitted-patient-care-activity/2018-19">https://digital.nhs.uk/data-and-information/publications/statistical/hospital-admitted-patient-care-activity/2018-19</a> and previous years.                                                                                                                                   |
| Japan / JPN                             | National Clinical Database                                               | Japanese Journal of Vascular Surgery, 2011–2017; <a href="http://www.jsvs.org/en/">http://www.jsvs.org/en/</a>                                                                                                                                                                                                                                                                                                                                                                  |
| New Zealand / NZL                       | Australasian Vascular Audit                                              | Khashram, Manar, Ian A. Thomson, Gregory T. Jones, and Justin A. Roake, "Abdominal aortic aneurysm repair in New Zealand: A validation of the Australasian Vascular Audit", ANZ Journal of Surgery, Vol. 87, No. 5 (2017): 394-398.                                                                                                                                                                                                                                             |
| Norway / NOR                            | National Vascular Surgery Registry (NORKAR)                              | NORKAR Årsrapport, 2014-2018<br><a href="https://stolav.no/fag-og-forskning/medisinske-kvalitetsregistre/norkar/rapporter">https://stolav.no/fag-og-forskning/medisinske-kvalitetsregistre/norkar/rapporter</a>                                                                                                                                                                                                                                                                 |
| Spain / ESP                             | Institute of Health Information,                                         | Requisitioned from Institute of Health Information (Instituto de Información Sanitaria) <a href="https://www.mscbs.gob.es/Sanidad">https://www.mscbs.gob.es/Sanidad</a> : Sanidad en datos                                                                                                                                                                                                                                                                                      |

|                                |                                                           |                                                                                                                                                                      |
|--------------------------------|-----------------------------------------------------------|----------------------------------------------------------------------------------------------------------------------------------------------------------------------|
|                                | (Instituto de Información Sanitaria)                      |                                                                                                                                                                      |
| Sweden / SWE                   | Vascular Registry in Sweden (Swedvasc)                    | Swedvasc Årsrapport, 2006–2017<br><a href="https://www.ucr.uu.se/swedvasc/arsrapporter">https://www.ucr.uu.se/swedvasc/arsrapporter</a>                              |
| Switzerland / CHE              | Office Fédéral de la Statistique                          | Requisitioned from Office Fédéral de la Statistique OFS<br>Division Santé et affaires sociales<br><a href="http://www.statistik.admin.ch">www.statistik.admin.ch</a> |
| Taiwan / TWN                   | National Health Insurance Research Database               | <a href="https://nhird.nhri.org.tw/en/index.htm">https://nhird.nhri.org.tw/en/index.htm</a>                                                                          |
| United States of America / USA | Society for Vascular Surgery: Vascular Quality Initiative | <a href="https://www.vqi.org/">https://www.vqi.org/</a>                                                                                                              |

## S2. Ruptured AAAs -- EVAR and mortality

Figure S1 presents the mean annual changes (in percentage points) in the treatment of ruptured AAAs by EVAR among females and males and the corresponding 95 percent confidence interval for each state.

Figure S1. Treatment of ruptured AAAs by EVAR: annual change

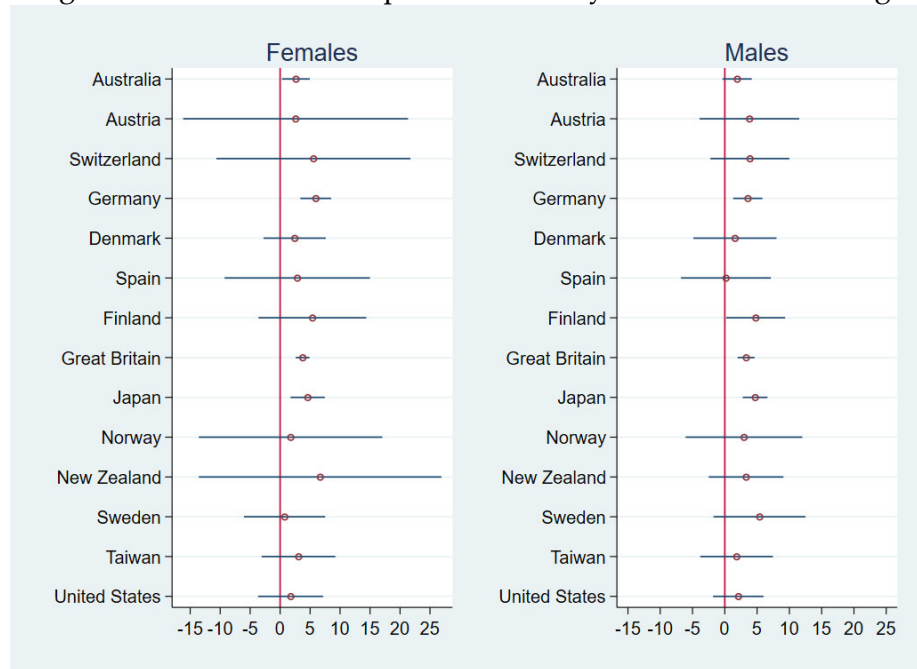

Notes: Figure depicts the mean annual change and 95 percent confidence interval in the percentage of ruptured AAAs treated by EVAR. Left: Female population; right: Male population.

Figure S2 presents the mean annual changes and the corresponding 95 percent CI in the age-adjusted mortality (per million population) due to ruptured AAAs. As the period of study is just six years, from 2011 to 2016, it would be challenging to carry out a meaningful statistical analysis of changes in trends. Previous research showed changes in trends of AAA mortality during the period of study among males for Australia, Denmark, Finland, Germany, and Spain, and among females for Australia, Denmark, Finland, Spain, Sweden, Great Britain (United Kingdom), and the United States (Al-Balah et al., British Journal of Surgery 2020). Accordingly, the annual rates of change should be interpreted with caution.

Figure S2. Age-adjusted mortality due to ruptured AAAs: annual change

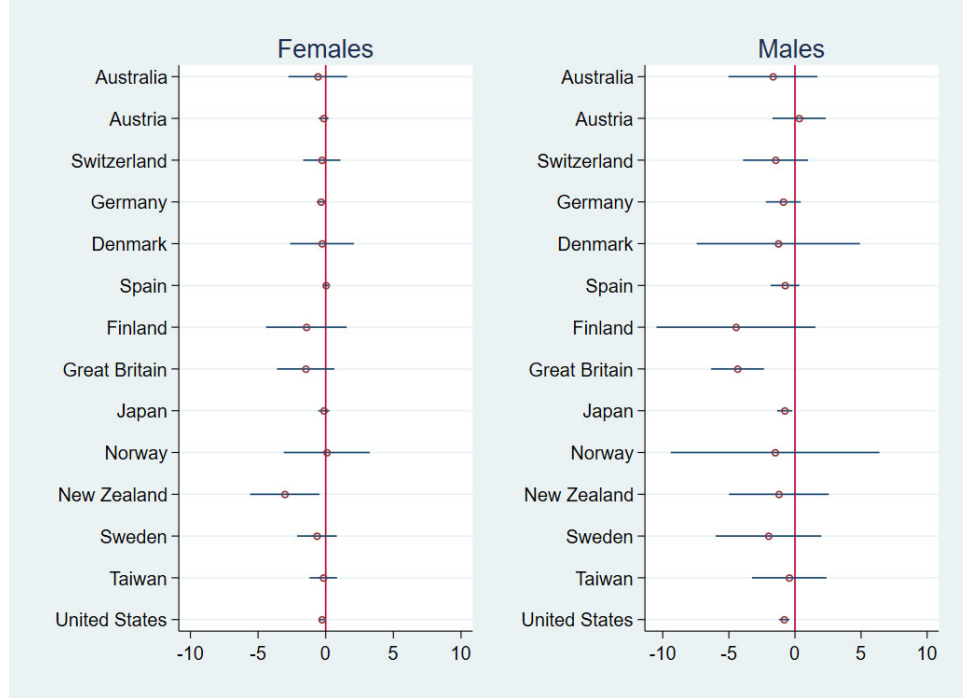

Notes: Figure depicts the mean annual change and 95 percent confidence interval in the age-adjusted mortality (per million persons) due to ruptured AAAs. Left: Female population; right: Male population.

### S3. Multiple regression: Supporting information and additional analyses

Formally, the multiple regression equation is, for each state  $s$  and year  $t$ ,

$$\ln \ln (MORTALITY_{st}) = \alpha + \beta_E EVAR_{st} + \beta_F FEMALE_{st} + \beta_A ASIAN_{st} + \beta_t YEAR_t + \varepsilon_{st}. \quad (1)$$

In equation (1),  $\ln(MORTALITY_{st})$  represents the natural logarithm of age-adjusted AAA mortality,  $EVAR_{st}$  represents the proportion of treatment by EVAR,  $FEMALE_{st}$  indicates the mortality of females,  $ASIAN_{st}$  indicates mortality in an Asian state,  $YEAR_t$  is a vector of indicators of the years 2012–2016, and  $\varepsilon_{st}$  is statistical error.

In equation (1), the parameters,  $\beta_E, \beta_F, \beta_A$ , are the coefficients of  $EVAR_{st}, FEMALE_{st}$ , and  $ASIAN_{st}$  respectively, and  $\beta_t$  is a vector of coefficients of the year indicators. The estimated coefficient,  $\beta_E$ , measures the effect of an increase in EVAR by 1 percentage point on the natural logarithm of age-adjusted AAA mortality. Hence, an increase in EVAR by 10 percentage points would be associated with a proportionate change in age-adjusted AAA mortality amounting to

$$\frac{e^{10\beta_E}-1}{MORTALITY'} \quad (2)$$

where  $MORTALITY$  is the average AAA mortality (prevalence).

To check whether the data meet the conditions for ordinary least squares multiple regression, Figure S3, panel A, presents P-P plots of age-adjusted ruptured AAA mortality in its raw form and specified as a natural logarithm. The distribution of raw mortality did not fit the normal distribution. The distribution of the natural logarithm of mortality closely fit the normal distribution. Accordingly, the multiple regression was estimated with the dependent variable specified as the natural logarithm of mortality. Figure S3, panel B, presents the kernel density of the residuals of the multiple regression. Consistent with the evidence from the P-P plots, the distribution of the residuals closely fits the normal distribution.

Figure S3. Fit with normal distribution

#### A. Ruptured AAA mortality: P-P Plots

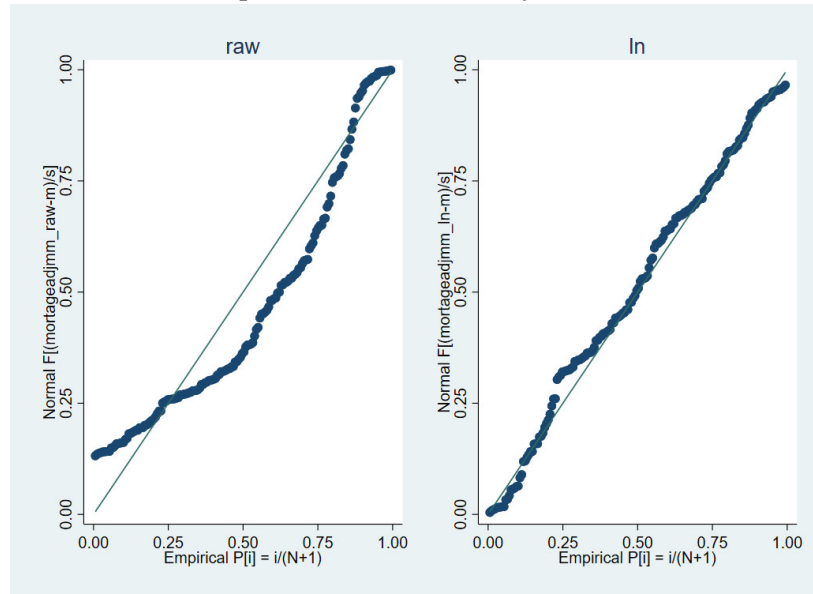

#### B. Multiple regression residuals: kernel density

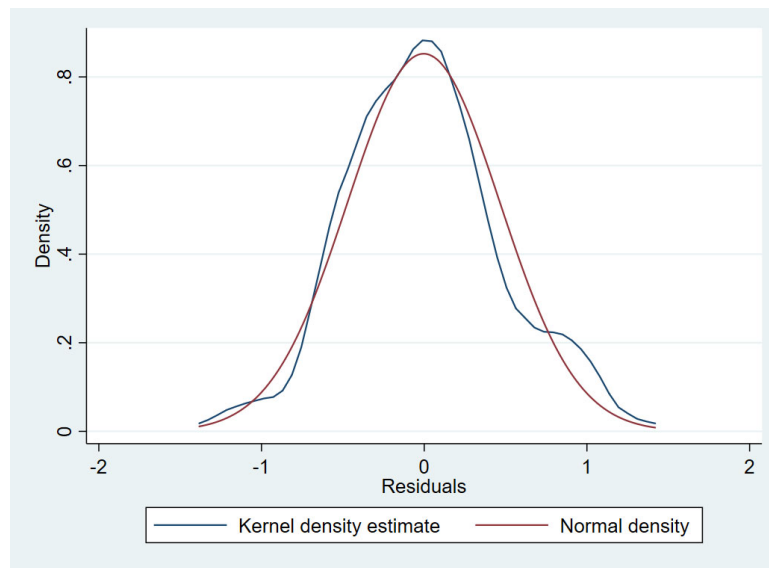

Figure S4 presents an RVF plot of the residuals of the multiple regression against the fitted values of the dependent variable. The residuals appeared to be fairly evenly and randomly distributed above and below the zero line, suggesting the absence of heteroscedasticity. Yet, the White's test could not reject the null hypothesis of no heteroscedasticity ( $\chi^2 = 35.13$ ,  $p = 0.5096$ ). Hence, in the multiple regression, the standard errors were estimated using the Huber–White robust option, clustered by state.

Figure S4. Heteroskedasticity

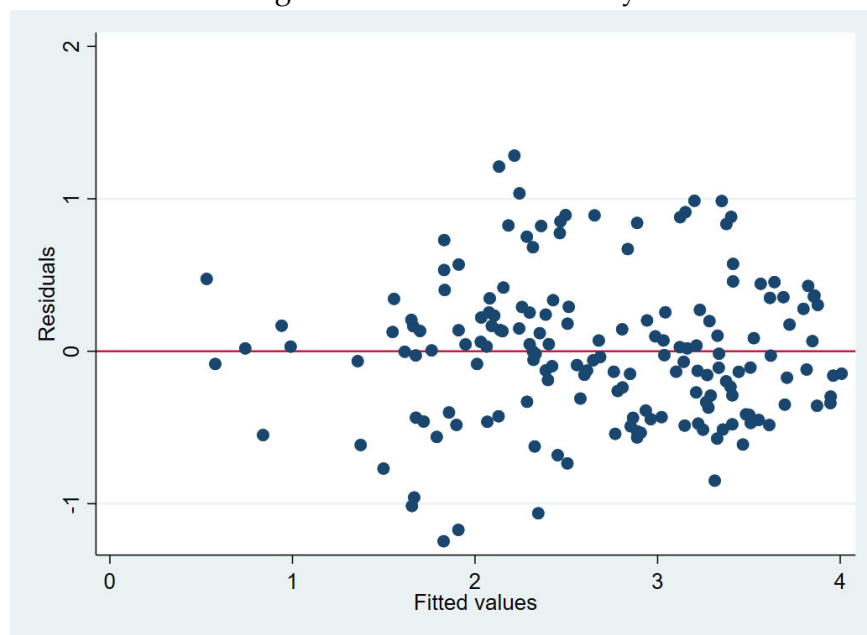

Finally, the mean variance inflation factor is 1.54, which is well within the conventional norm of 5 for absence of multicollinearity.

Table S2 summarizes the data used in the multiple regression analysis.

| Table S2. Multiple regression sample: summary statistics |     |       |                |      |       |
|----------------------------------------------------------|-----|-------|----------------|------|-------|
|                                                          | N   | Mean  | Std dev        | Min  | Max   |
| Ruptured AAA mortality (age-adjusted per million)        | 168 | 20.90 | 17.49          | 1.34 | 76.48 |
| EVAR (percent)                                           | 168 | 35.8  | 21.2           | 0    | 100   |
| Females                                                  | 168 | 0.5   | Not meaningful | 0    | 1     |
| East Asian                                               | 168 | 0.143 | 0.351          | 0    | 1     |

In the main document, Table 1 presents the multiple regression estimates. However, prior research covering 10 of the 14 states in the present study found some changes in the trends of AAA mortality among females and males during the period of the present study (Al-Balah et al. 2020). Table S3 presents estimates limited to the years 2015-2016, during which there were no changes in the trends of AAA mortality among either females or males (Al-Balah 2020: Tables 1 and 2). The results are similar to those reported in Table 1 for the entire study period, 2011-2016.

Another possible concern with the analysis is differences in screening programs across states. During the period of study, Great Britain and Sweden screened men and the USA screened both men and women (Al-Balah et al. 2020; Stather PW, Dattani N, Bown MJ, Earnshaw JJ, Lees TA. International variations in AAA screening. Eur J Vasc Endovasc Surg 2013; 45: 231-234). As for other states in this study, there is no evidence of any screening program. Table S4 presents estimates including an additional explanatory variable to control for the presence of a screening program in the state at the time. The results are similar to those reported in Table 1 without control for screening program.



Table S3. Ruptured AAA mortality: sample limited to 2015–2016

| VARIABLES                   | (a)                        |             | (b)                        |             | (c)                        |             | (d)                        |             | (e)                        |             |
|-----------------------------|----------------------------|-------------|----------------------------|-------------|----------------------------|-------------|----------------------------|-------------|----------------------------|-------------|
|                             | Entire sample              |             | Females                    |             | Males                      |             | Europe+ states             |             | East Asian states          |             |
|                             | Coefficient<br>(c.i.)      | p-<br>value |
| EVAR                        | -0.024<br>(-0.031, -0.016) | 0.001       | -0.026<br>(-0.037, 0.014)  | 0.001       | -0.021<br>(-0.030, -0.012) | 0.001       | -0.035<br>(-0.037, -0.013) | 0.001       | -0.022<br>(-0.022, -0.022) | 0.001       |
| Female                      | -1.073<br>(-1.305, -0.841) | 0.001       |                            |             |                            |             | -1.086<br>(-1.342, -0.831) | 0.001       | -0.994<br>(-7.355, 6.366)  | 0.297       |
| East Asian                  | -0.032<br>(-0.410, 0.347)  | 0.859       | -0.081<br>(-0.476, 0.638)  | 0.759       | -0.153<br>(-0.617, -0.311) | 0.489       |                            |             |                            |             |
| Year indicator<br>variables | Yes                        |             |
| Observations                | 56                         |             | 28                         |             | 28                         |             | 48                         |             | 8                          |             |
| R-squared                   | 0.709                      |             | 0.495                      |             | 0.553                      |             | 0.644                      |             | 0.940                      |             |
| States                      | 14                         |             | 14                         |             | 14                         |             | 12                         |             | 2                          |             |
| Average<br>mortality        | 18.58                      |             | 9.91                       |             | 27.24                      |             | 20.04                      |             | 9.78                       |             |
| EVAR effect<br>c.i.         | -0.011<br>(-0.014, -0.008) |             | -0.023<br>(-0.031, -0.015) |             | -0.007<br>(-0.009, -0.005) |             | -0.011<br>(-0.015, -0.007) |             | -0.020<br>(-0.020, -0.020) |             |

Notes: This table reports multiple regression estimates of AAA mortality by ordinary least squares including indicator variables for years (excluding 2011 as reference), using Stata routine, regress, with robust standard errors clustered by state. The dependent variable is the natural logarithm of age-adjusted AAA mortality (per million persons). Column (a): Global sample: all states, both sexes; Column (b): all states, females; Column (c): all states, males; Column (d): non-East Asian states, both sexes; Column (e): East Asian states, both sexes. The EVAR effect is the proportionate change in age-adjusted AAA mortality associated with an increase in EVAR by 10 percentage points.

Table S4. Ruptured AAA mortality: control for screening program

| VARIABLES                | (a)                        |         | (b)                       |         | (c)                        |         | (d)                        |         | (e)                        |         |
|--------------------------|----------------------------|---------|---------------------------|---------|----------------------------|---------|----------------------------|---------|----------------------------|---------|
|                          | Entire sample              |         | Females                   |         | Males                      |         | Europe+ states             |         | East Asian states          |         |
|                          | Coefficient<br>(CI)        | p-value | Coefficient<br>(CI)       | p-value | Coefficient<br>(CI)        | p-value | Coefficient<br>(CI)        | p-value | Coefficient<br>(CI)        | p-value |
| EVAR                     | -0.026<br>(-0.035, -0.017) | 0.001   | -0.026<br>(-0.040, 0.013) | 0.001   | -0.025<br>(-0.037, -0.013) | 0.001   | -0.029<br>(-0.043, -0.014) | 0.001   | -0.022<br>(-0.022, -0.022) | 0.001   |
| Female                   | -1.021<br>(-1.245, -0.798) | 0.001   |                           |         |                            |         | -1.017<br>(-1.269, -0.766) | 0.001   | -0.994<br>(-7.355, 5.366)  | 0.297   |
| East Asian               | 0.087<br>(-0.355, 0.528)   | 0.679   | -0.103<br>(-0.575, 0.782) | 0.748   | 0.055<br>(-0.573, -0.684)  | 0.852   |                            |         |                            |         |
| Screening                | 0.332<br>(-0.241, 0.905)   | 0.233   | 0.105<br>(-0.490, 0.701)  | 0.708   | 0.409<br>(-0.281, 1.098)   | 0.223   | 0.382<br>(-0.212, 0.976)   | 0.185   |                            |         |
| Year indicator variables | Yes                        |         | Yes                       |         | Yes                        |         | Yes                        |         | Yes                        |         |
| Observations             | 56                         |         | 28                        |         | 56                         |         | 48                         |         | 8                          |         |
| R-squared                | 0.723                      |         | 0.578                     |         | 0.623                      |         | 0.665                      |         | 0.940                      |         |
| States                   | 14                         |         | 14                        |         | 14                         |         | 12                         |         | 2                          |         |
| Average mortality        | 18.58                      |         | 9.91                      |         | 27.24                      |         | 20.04                      |         | 9.78                       |         |
| EVAR effect              | -0.012                     |         | -0.023                    |         | -0.008                     |         | -0.012                     |         | -0.020                     |         |
| c.i.                     | (-0.015, -0.009)           |         | (-0.032, -0.014)          |         | (-0.011, -0.005)           |         | (-0.017, -0.007)           |         | (-0.020, -0.020)           |         |

Notes: This table reports multiple regression estimates of AAA mortality by ordinary least squares including indicator variables for years (excluding 2011 as reference), using Stata routine, regress, with robust standard errors clustered by state. The dependent variable is the natural logarithm of age-adjusted AAA mortality (per million persons). Column (a): Global sample: all states, both sexes; Column (b): all states, females; Column (c): all states, males; Column (d): non-East Asian states, both sexes; Column (e): East Asian states, both sexes. The EVAR effect is the proportionate change in age-adjusted AAA mortality associated with an increase in EVAR by 10 percentage points.
